# Supplementary material for: Biological maturation determines the beneficial effects of high-intensity functional training on cardiorespiratory fitness in male adolescents
Source: PeerJ. 2025 Jul 28;13:e19756. doi: 10.7717/peerj.19756 (PMC12312688; doi:10.7717/peerj.19756)
Supplement: Supplemental Information 1 [file peerj-13-19756-s001.xlsx]

## Sheet: Arkusz1
	id_END	lp_cutting_export	condition	Age_group category	age years	maturity offset	maturity offset category	body height cm	body weight kg	bmi1	body fat mass kg	systolic blood pressure mmhg	diastolic blood pressure mmhg	beep test meters
1	1	1	exp	ei18	18.4394	4.20306	E-EM	183.2	85.8	25.5644	-0.75	-3	-13	40
2	2	2	exp	ei18	18.2888	3.92503	E-EM	180.5	62.6	19.2141	-2.3	-37	-6	260
3	3	3	exp	fi15	15.3511	1.34962	E-LM	168.6	74.9	26.3492	-1.1	-22	-9	100
4	4	4	exp	se17	17.6318	3.59213	E-EM	182	62.2	18.7779	-1.3	11	0	400
5	5	5	exp	fi15	15.2717	1.22955	E-LM	167.3	67.5	24.1164	0.4	-25	-2	140
6	6	6	exp	se17	17.5031	3.76044	E-EM	186	72.6	20.9851	0.9	-18	-3	360
7	7	7	exp	si16	16.835	2.95277	E-MLM	180.1	70.3	21.6734	-1.4	-11	-8	20
8	8	8	exp	si16	16.9802	3.2864	E-MEM	184	76.5	22.5957	-1.3	-6	-4	40
9	9	9	exp	si16	16.9582	3.30247	E-MEM	184.5	72.5	21.2983	-1.4	-1	3	360
10	10	10	exp	ei18	18.2943	3.98808	E-EM	181.4	70.9	21.5462	1.7	-15	2	380
11	11	11	exp	si16	16.9473	3.75433	E-EM	192	64.6	17.5239	0.4	5	6	600
12	12	12	exp	si16	16.9884	2.67203	E-MLM	173.9	70	23.1472	-2.3	2	8	300
13	13	13	exp	si16	16.9473	3.42986	E-MEM	186.7	73.3	21.0288	-4.1	-3	-7	200
14	14	14	exp	si16	16.9446	1.57945	E-LM	156.5	52.1	21.272	-1.4	10	12	-100
15	15	15	exp	fi15	15.1211	1.71209	E-LM	177.8	79.6	25.1796	3.5	-4	-2	0
16	16	16	exp	se17	17.6345	3.21171	E-MEM	176	66.1	21.3391	-4.4	-1	-1	140
17	17	17	exp	se17	17.7221	3.32503	E-MEM	176.9	74.8	23.9026	-2	-14	-3	80
18	18	18	exp	si16	16.7283	2.81079	E-MLM	178.9	66.4	20.7466	-0.6	12	-4	280
19	19	19	exp	ei18	18.026	3.59086	E-MEM	178	69.8	22.03	0.6	4	-2	40
20	20	20	exp	si16	16.9911	3.18934	E-MEM	182.3	88.6	26.66	-1.8	-14	-20	-20
21	21	21	exp	si16	16.8679	2.69385	E-MLM	175.5	62.5	20.292	-0.3	-5	1	-200
22	22	22	exp	se17	17.1828	3.12933	E-MLM	179.3	76.2	23.7025	1	0	-3	40
23	23	23	exp	se17	17.3689	3.11816	E-MLM	177.2	67.8	21.5925	-1.4	-4	-13	-160
24	24	24	exp	se17	17.4127	3.43554	E-MEM	181.8	71	21.4818	-2	4	-3	160
25	25	25	exp	se17	17.6537	4.32077	E-EM	193.2	87	23.308	1.3	-9	-6	480
26	26	26	exp	si16	16.95	2.99697	E-MLM	179.6	89.5	27.7466	-3.1	-8	-14	0
27	27	27	exp	si16	16.8679	3.16913	E-MEM	183.3	79.4	23.6317	-3.5	5	-13	40
28	28	28	exp	si16	16.8487	2.80952	E-MLM	177.6	81	25.6802	-1.3	-2	-4	20
29	29	29	exp	fi15	15.5565	2.17152	E-LM	181	98.9	30.1883	-5.6	0	-3	-20
30	30	30	exp	si16	16.8761	2.91853	E-MLM	179.1	64.9	20.2327	2.6	-8	-1	0
31	31	31	exp	se17	17.2156	3.19414	E-MEM	180.2	71.3	21.9574	-2.1	-4	-4	80
32	32	32	exp	ei18	18.0561	3.69502	E-EM	179.3	57	17.7302	0.3	-12	-13	-40
33	33	33	exp	ei18	18.3847	4.58523	E-EM	189.5	81.3	22.6398	-1.4	-12	-6	100
34	34	34	exp	se17	17.1554	3.30991	E-MEM	182.5	62.1	18.6451	0.4	11	-12	140
35	35	35	exp	ei18	18.2478	3.17315	E-MEM	169.5	67.8	23.5988	-1.5	-15	-3	100
36	36	36	exp	se17	17.7495	3.09246	E-MLM	173	69	23.0546	-0.7	-5	-9	140
37	37	37	ctrl	se17	17.7687	3.52808	C-EM	179.6	60.9	18.8801	-0.2	-3	1	180
38	38	38	exp	fi15	15.1431	1.51829	E-LM	174	58.9	19.4544	0.4	9	-1	0
39	39	39	exp	fi15	15.5565	1.09255	E-LM	161.8	68.2	26.0512	-1.2	-1	-1	120
40	40	40	exp	ei18	18.3299	3.17709	E-MEM	168.8	58.4	20.4959	-0.6	-9	0	20
41	41	41	exp	ei18	18.6913	3.82959	E-EM	175.2	59.3	19.3191	0.2	13	0	420
42	42	42	exp	se17	17.1855	3.03178	E-MLM	177.7	64.2	20.3311	-3.5	2	-10	40
43	43	43	exp	fi15	15.011	1.57	E-LM	176.5	71	22.7913	0.1	-9	1	40
44	44	44	exp	fi15	15.0712	1.59	E-LM	176.2	65.5	21.0974	-0.9	-12	-4	60
45	45	45	exp	ei18	18.1766	3.81901	E-EM	180	74.8	23.0864	0	-5	-8	160
46	46	46	exp	se17	17.5387	3.13811	E-MLM	175.8	67.9	21.9701	1.4	8	2	120
47	47	47	exp	si16	16.9391	2.99598	E-MLM	179.7	71.8	22.2345	-1.9	-21	-3	60
48	48	48	exp	fi15	15.0637	1.27793	E-LM	170.5	55.9	19.2293	1.3	5	-10	300
49	49	49	exp	fi15	15.2717	1.18541	E-LM	166.5	60.5	21.8236	-2.6	-10	-8	-100
50	50	50	exp	fi15	15.3457	1.91172	E-LM	178.8	74	23.1471	-0.5	-3	-11	-240
51	51	51	exp	ei18	18.0096	3.17694	E-MEM	171.8	75.5	25.58	-0.7	-6	-16	200
52	52	52	exp	ei18	18.0041	3.71986	E-EM	180.2	72.2	22.2345	1	-16	1	240
53	53	53	exp	ei18	18.4476	4.30846	E-EM	184.7	79.1	23.1869	-0.2	-11	0	380
54	54	54	ctrl	si16	16.909	3.57504	C-EM	189.5	67.3	18.7412	-1.3	-10	0	-80
55	55	55	exp	se17	17.7604	3.55483	E-MEM	180.1	78.3	24.1398	-3.5	-6	-6	260
56	56	56	exp	fi15	15.3539	1.86156	E-LM	177.8	92	29.1021	1.2	-7	-12	120
57	57	57	exp	fi15	15.0219	1.82	E-LM	181	98.4	30.0357	1.9	-10	-5	100
58	58	58	exp	ei18	18.423	3.79289	E-EM	177.2	105.4	33.5671	0.6	-22	-2	220
59	59	59	exp	fi15	15.8138	1.2544	E-LM	162	65	24.7676	-0.9	-14	-3	280
60	60	60	exp	ei18	18.0397	4.34256	E-EM	189.4	78.9	21.9946	-1.1	-10	-2	400
61	61	61	exp	se17	17.1636	2.68911	E-MLM	172.4	70.9	23.8546	-0.5	0	9	80
62	62	62	ctrl	fi15	15.0521	1.28	C-LM	170.7	63.7	21.8611	1.4	-9	-5	140
63	63	63	ctrl	fi15	15.3922	1.11886	C-LM	164	46.8	17.4004	0.2	-3	1	20
64	64	64	ctrl	se17	17.7769	3.42424	C-MEM	177.9	72.1	22.7816	4	-1	1	-40
65	65	65	ctrl	ei18	18.4093	3.87057	C-EM	178.5	56.4	17.7012	0.8	0	-1	20
66	66	66	ctrl	ei18	18.2943	3.47921	C-MEM	173.7	54.2	17.9639	0.4	0	-4	-40
67	67	67	ctrl	se17	17.7385	3.21378	C-MEM	175	62.6	20.4408	-1.9	8	1	-200
68	68	68	ctrl	ei18	18.0287	3.85313	C-EM	182	64.9	19.593	1.2	-2	2	-100
69	69	69	ctrl	ei18	18.1437	4.09259	C-EM	184.5	76.8	22.5615	2.7	-7	0	-60
70	70	70	ctrl	fi15	15.4552	1.36274	C-LM	167.7	64.4	22.8992	-2.1	-3	-3	-20
71	71	71	ctrl	se17	17.191	3.42652	C-MEM	184	63.7	18.815	-0.4	-1	0	-40
72	72	72	ctrl	fi15	15.5044	2.23832	C-MLM	182.8	69.6	20.8284	0.5	0	-1	-160
73	73	73	ctrl	si16	16.9281	3.00722	C-MLM	180	73	22.5309	-1.1	-5	6	-160
74	74	74	ctrl	si16	16.8624	2.92794	C-MLM	179.4	84.3	26.1928	-2.3	-5	2	-160
75	75	75	ctrl	ei18	18.0123	3.62761	C-EM	178.7	74.5	23.3296	1.6	-6	5	-20
76	76	76	ctrl	ei18	18.026	3.78621	C-EM	181	68.9	21.0311	6.8	1	0	-200
77	77	77	ctrl	ei18	18.4148	3.97389	C-EM	180	68.9	21.2654	0.5	8	-4	-140
78	78	78	ctrl	se17	17.2923	3.35018	C-MEM	181.7	68.7	20.8088	-0.4	3	0	-20
79	79	79	ctrl	ei18	17.9986	4.00888	C-EM	184.7	68.5	20.0797	0.3	7	2	-60
80	80	80	ctrl	ei18	18.4613	4.47098	C-EM	187	63.4	18.1303	0.3	-2	5	0
81	81	81	ctrl	fi15	15.4415	1.76165	C-LM	175	53.5	17.4694	-0.2	-5	3	120
82	82	82	ctrl	fi15	15.1376	0.771156	C-LM	160.4	69.4	26.9743	0.6	7	-2	-140
83	83	83	ctrl	fi15	15.4908	1.70886	C-LM	173.5	61.9	20.5632	1	0	-3	200
84	84	84	ctrl	se17	17.1499	3.36825	C-MEM	183.5	79.7	23.6693	-1.3	-2	-1	40
85	85	85	ctrl	fi15	15.7454	2.15284	C-MLM	178.5	63	19.7726	2.3	0	3	-40
86	86	86	ctrl	fi15	15.1814	1.80562	C-LM	178.8	76.5	23.9291	1	5	-9	20
87	87	87	ctrl	si16	16.0055	2.4651	C-MLM	181	104.2	31.8061	-0.6	-1	2	40
88	88	88	ctrl	fi15	15.6003	1.46755	C-LM	168	64.9	22.9946	0	-2	-1	0
89	89	89	ctrl	fi15	15.5209	1.47543	C-LM	169	71.2	24.9291	0.5	2	3	-40
90	90	90	ctrl	fi15	15.1129	1.60854	C-LM	176.4	78.4	25.1953	0.5	-2	2	400
91	91	91	ctrl	fi15	15.5784	1.84818	C-LM	175	58.8	19.2	0.2	6	4	-40
92	92	92	ctrl	fi15	15.321	1.68549	C-LM	175.1	77.6	25.3098	-0.1	-2	3	-60
93	93	93	ctrl	ei18	18.7023	4.1473	C-EM	179.8	65.8	20.3538	0.5	2	1	20
94	94	94	ctrl	si16	16.9829	2.94467	C-MLM	178.4	66.1	20.7688	-1.1	2	2	40
95	95	95	ctrl	se17	17.6591	3.8015	C-EM	185	68	19.8685	0.4	-7	-1	-20
96	96	96	ctrl	ei18	18.4422	4.37143	C-EM	185.7	69.8	20.241	-1.8	-4	2	40
97	97	97	ctrl	si16	16.9692	2.5374	C-MLM	171.9	74	25.0426	0.6	-2	3	0
98	98	98	ctrl	se17	17.4292	3.42115	C-MEM	181.4	67.7	20.5738	0.7	-2	2	-80
99	99	99	ctrl	se17	17.7577	3.51456	C-MEM	179.5	74.8	23.2152	0.3	-2	3	60
100	100	100	exp	fi15	15.7399	2.29145	E-MLM	181	71.5	21.8247	0.4	-7	5	320
101	101	101	ctrl	ei18	18.8419	3.57096	C-EM	170	58.4	20.2076	1.1	3	3	-40
102	102	102	ctrl	si16	16.9802	2.9797	C-MLM	179	58.5	18.2579	0.1	2	6	0
103	103	103	ctrl	si16	16.9336	2.92514	C-MLM	178.6	72.5	22.7287	0.6	-2	1	-40
104	104	104	ctrl	si16	16.9802	2.82022	C-MLM	176.4	69.5	22.3351	0.2	-5	-1	0
105	105	105	ctrl	se17	17.306	3.40918	C-MEM	182.5	67.2	20.1764	0.6	-2	6	20
106	106	106	ctrl	si16	16.9884	3.27959	C-MEM	183.8	65.5	19.3888	-0.8	-2	0	40
107	107	107	ctrl	si16	16.8186	2.54717	C-MLM	173.6	79.4	26.3464	0.3	-3	-4	-20
108	108	108	ctrl	se17	17.3963	3.30536	C-MEM	179.9	66.5	20.5475	0.1	-3	3	-20
109	109	109	ctrl	se17	17.1335	3.29547	C-MEM	182.5	75.8	22.7585	-0.1	2	2	120
110	110	110	ctrl	se17	17.1773	2.85896	C-MLM	175	59	19.2653	0.2	1	-2	-40
111	111	111	ctrl	se17	17.2512	3.09265	C-MEM	178	68.4	21.5882	-0.1	-3	-1	-40
112	112	112	ctrl	se17	17.1855	3.23664	C-MEM	181	69.4	21.1837	0.5	0	-1	40
113	113	113	ctrl	si16	16.9309	2.88668	C-MLM	178	77.3	24.3972	0.1	-1	3	-100
114	114	114	ctrl	si16	16.0767	1.98896	C-LM	172	76.5	25.8586	1.42109e-14	-1	-3	-20
115	115	115	ctrl	si16	16.9884	2.49407	C-MLM	171	73.5	25.1359	-0.5	1	4	40
116	116	116	ctrl	si16	16.1506	2.03489	C-LM	179	72.9	22.7521	0.4	1	-1	-40
